# Supplementary material
Source: Springer Nature journal article supplement (https://www.springermedizin.de/resource/supplementary/12889_2007_892_MOESM1_ESM.pdf/9502010)
Supplement: MOESM1 [file 9502010]

**Rotavirus  
vaccines**

**Zinc  
treatment**

**Enhanced  
Diarrheal  
Disease  
Control**

**Sanitation/  
hygiene**

**Oral rehydration  
therapy/  
breastfeeding**
